# Supplementary material for: Genetic Diversity of Spike, 3a, 3b and E Genes of Infectious Bronchitis Viruses and Emergence of New Recombinants in Korea
Source: Viruses. 2013 Jan 31;5(2):550–67. doi: 10.3390/v5020550 (PMC3640513; doi:10.3390/v5020550)
Supplement: Supplementary File 1 — Supplementary Material (PDF, 717 KB) [file viruses-05-00550-s001.pdf]

# Supplementary Material

**Figure S1.** Phylogenetic trees based on nucleotide sequence of S1 (a), S2 (b), 3a (c), 3b (d), E (e) and S1-E (f) genes of IBVs, where the 27 Korean IBV strains are marked with a filled triangle. Phylogenetic trees were constructed with the Maximum-likelihood method using MEGA 5.05 version. The bootstrap values were determined from 1000 replicates of the original data. The branch number represents the percentage of times that the branch appeared in the tree. Bootstrap values greater than 50% are shown. The p-distance is indicated by the bar at the bottom of the figure.

(a) S1

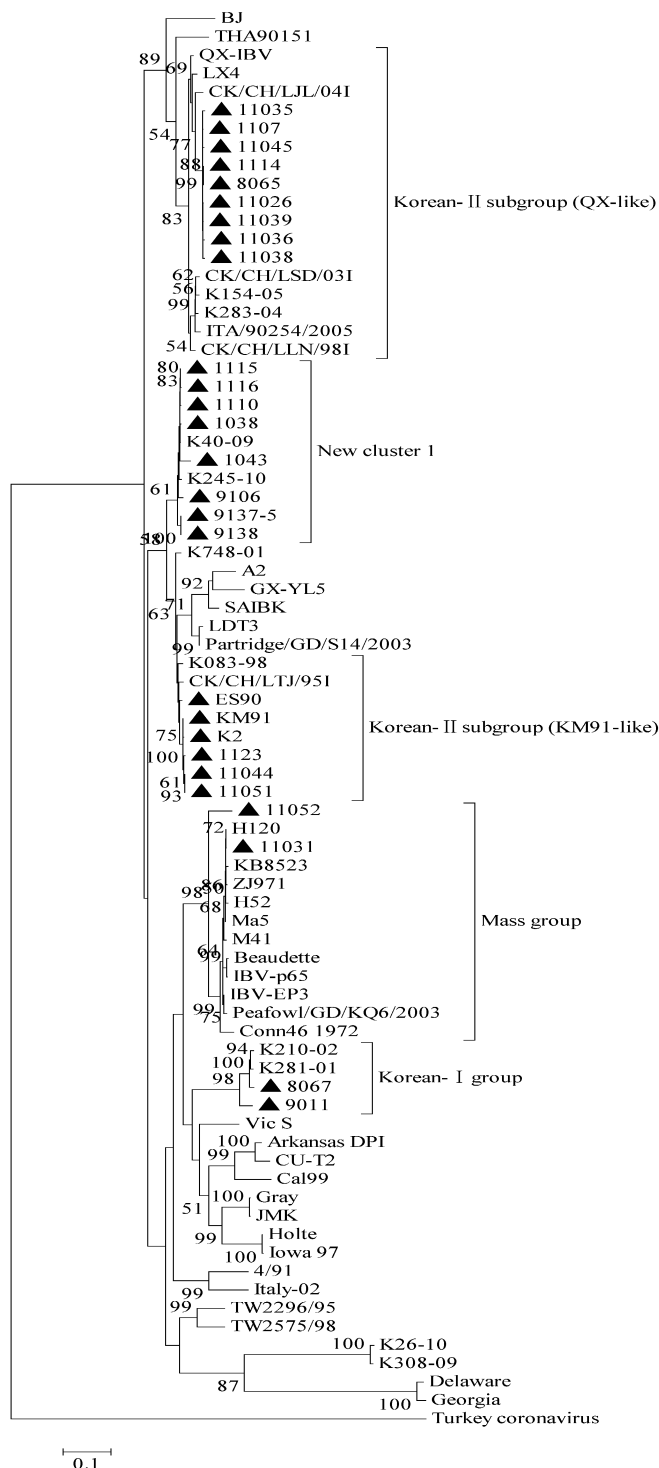

(b) S2

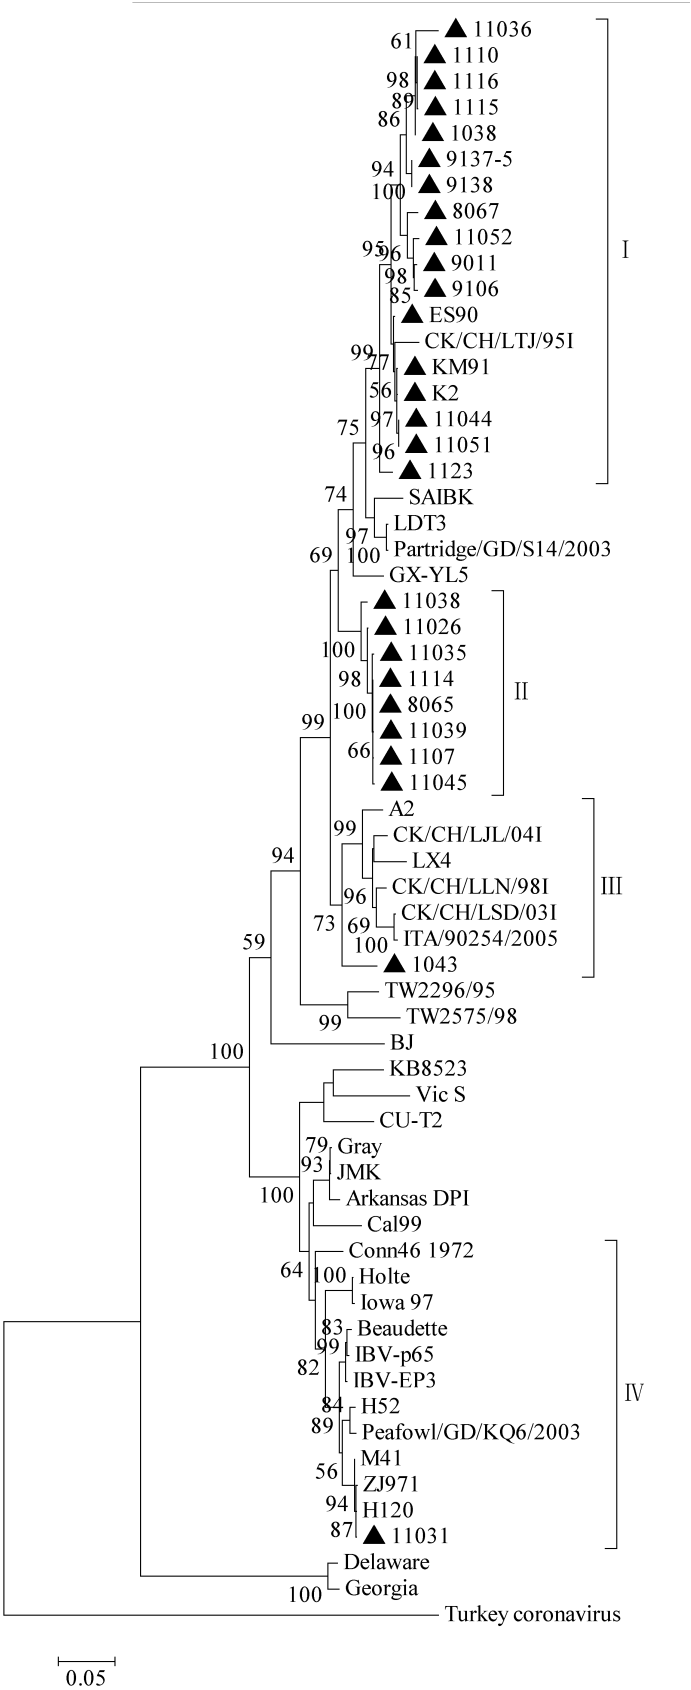

(c) 3a

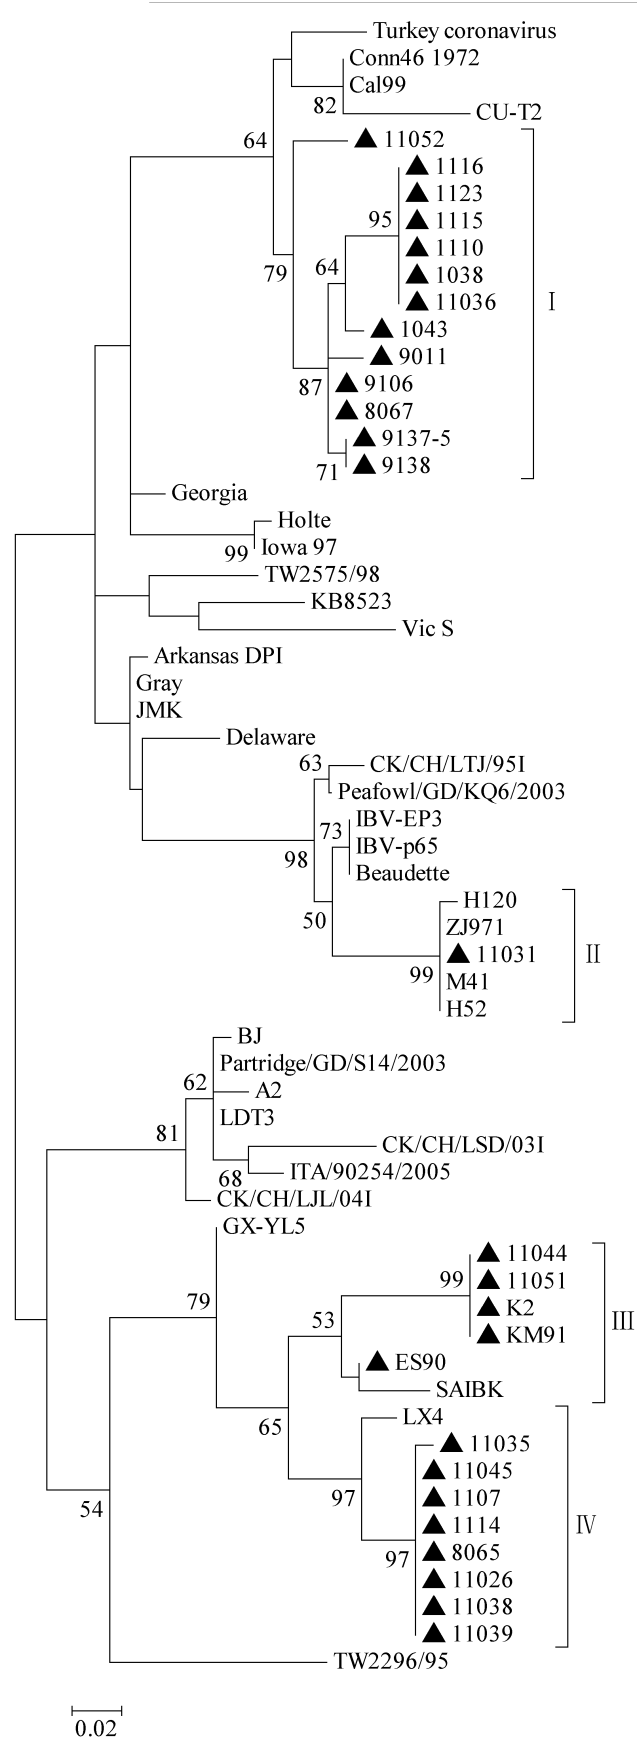

(d) 3b

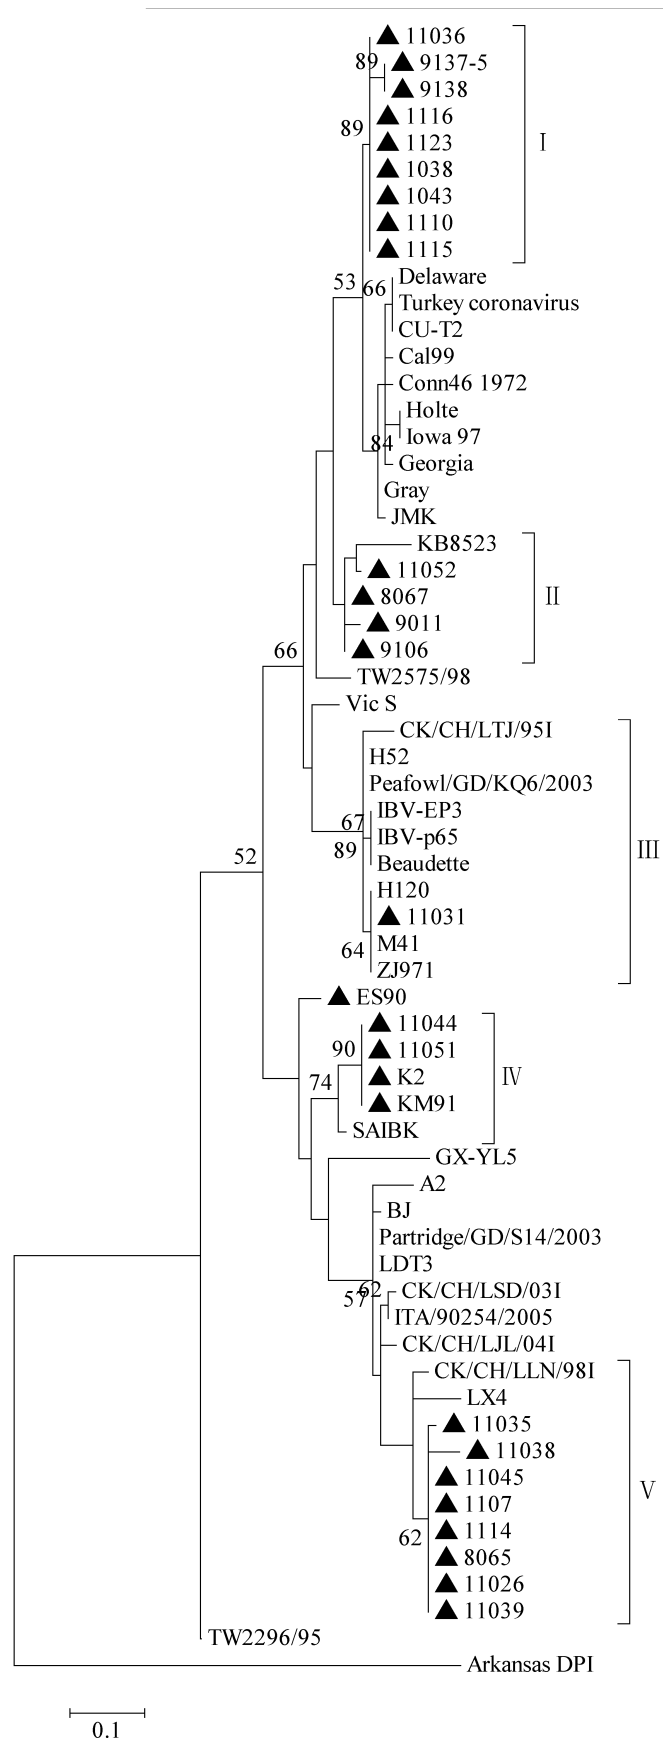

## (e) E

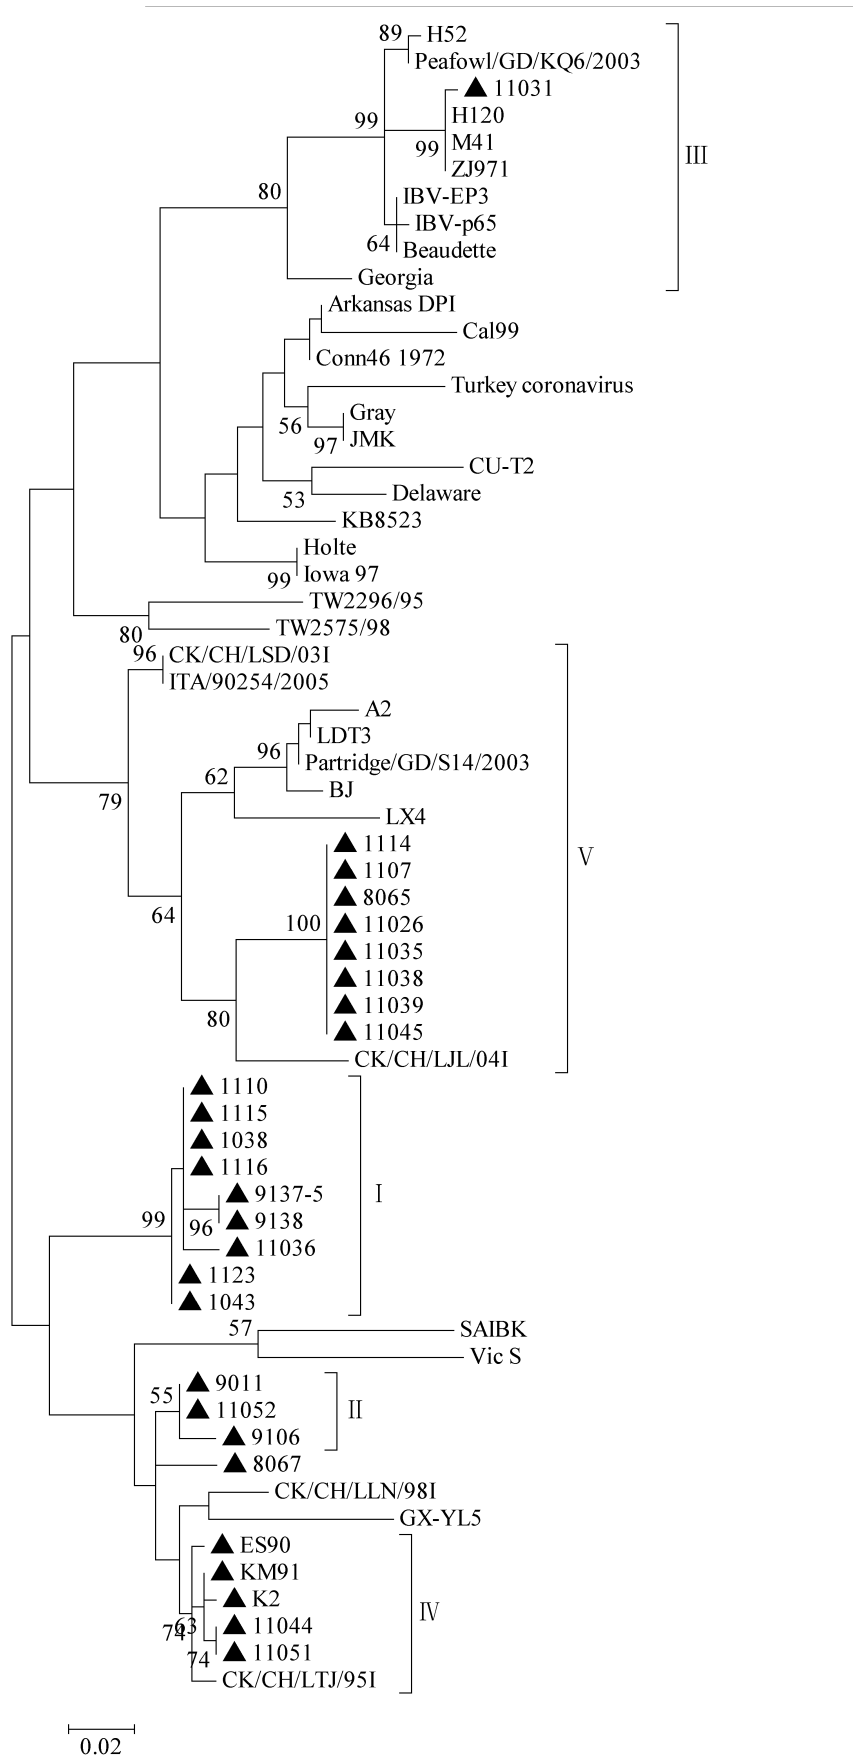

(f) S1-E

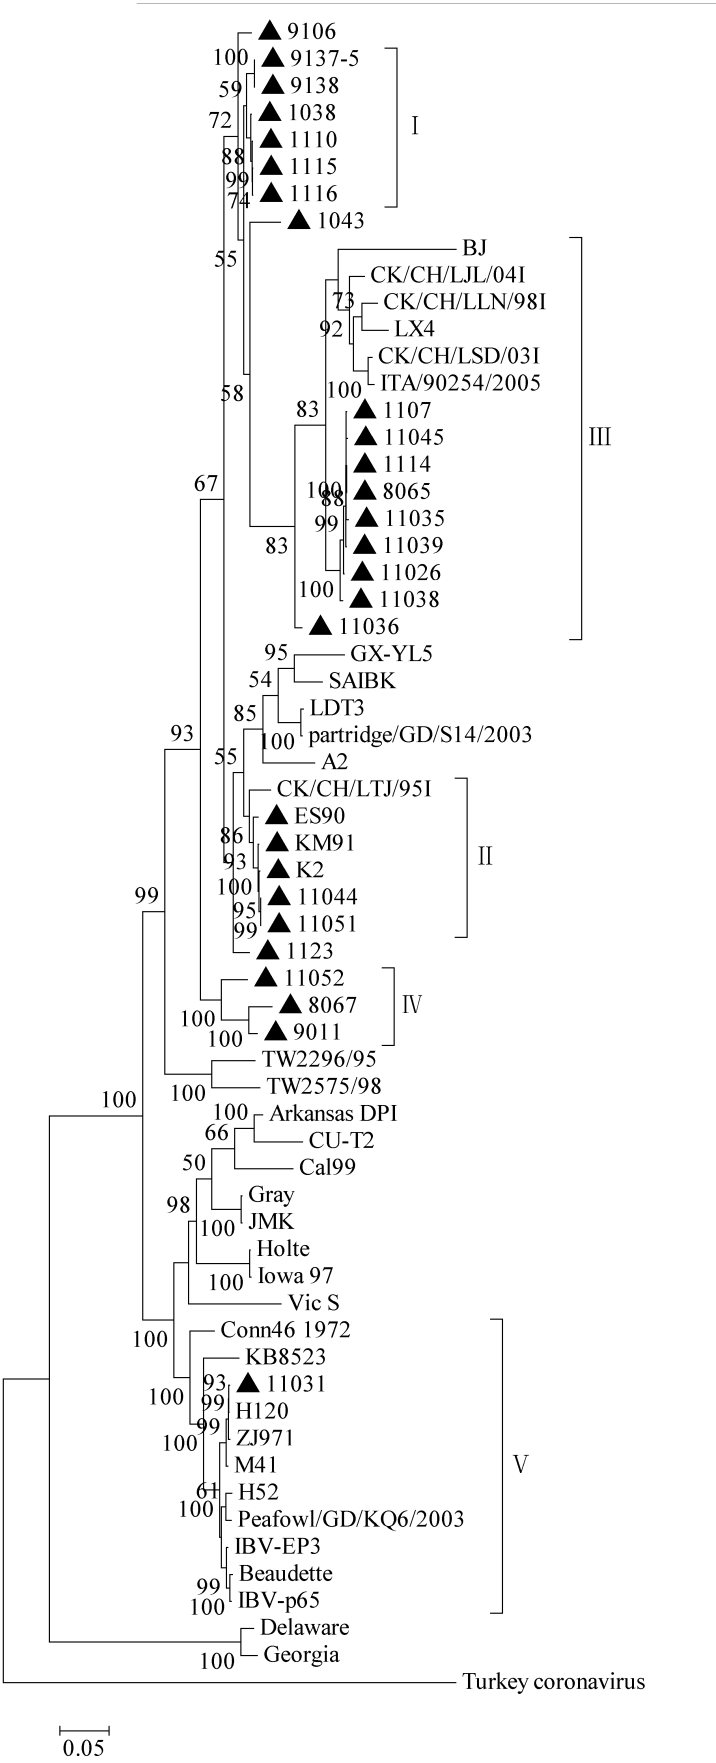

**Figure S2.** Virus numbers of genotypes isolated during different years.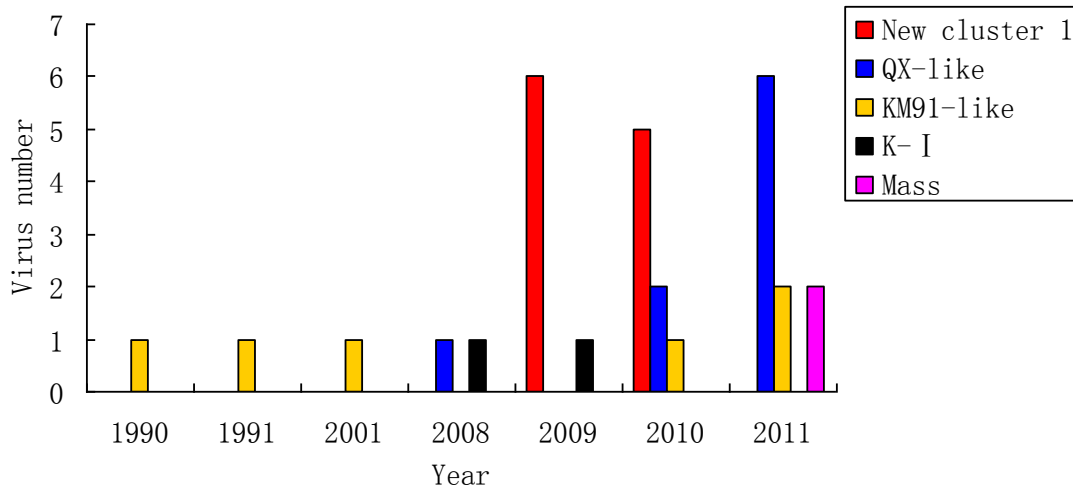**Table S1.** Comparison of ORF sizes in the S, 3a, 3b and E gene encoding regions of IBV <sup>a</sup>.

| Strains | Genotype      | S1        | S2        | Gene 3   |          |         |              |          |
|---------|---------------|-----------|-----------|----------|----------|---------|--------------|----------|
|         |               |           |           | 3a       | Del (nt) | 3b      | Del/ins (nt) | 3c/E     |
| M41     | Mass          | 1611(537) | 1878(625) | 174 (57) | -        | 195(64) | -/-          | 330(109) |
| 11031   | Mass          | 1611(537) | 1878(625) | 174 (57) | -        | 195(64) | -/-          | 330(109) |
| 11052   | Mass          | 1611(537) | 1878(625) | 174 (57) | -        | 195(64) | -/-          | 333(110) |
| 8067    | Korean type I | 1632(544) | 1878(625) | 174 (57) | -        | 195(64) | -/-          | 327(108) |
| 9011    | Korean type I | 1629(543) | 1878(625) | 174 (57) | -        | 195(64) | -/-          | 333(110) |
| 8065    | QX-like       | 1620(540) | 1878(625) | 174 (57) | -        | 189(62) | 5/-          | 327(108) |
| 1107    | QX-like       | 1614(538) | 1878(625) | 174 (57) | -        | 189(62) | 5/-          | 327(108) |
| 1114    | QX-like       | 1620(540) | 1878(625) | 174 (57) | -        | 189(62) | 5/-          | 327(108) |
| 11026   | QX-like       | 1617(539) | 1878(625) | 174 (57) | -        | 189(62) | 5/-          | 327(108) |
| 11035   | QX-like       | 1620(540) | 1878(625) | 174 (57) | -        | 189(62) | 5/-          | 327(108) |
| 11036   | QX-like       | 1620(540) | 1878(625) | 174 (57) | -        | 195(64) | -/-          | 333(110) |
| 11038   | QX-like       | 1620(540) | 1878(625) | 174 (57) | -        | 219(72) | 3/30         | 327(108) |
| 11039   | QX-like       | 1620(540) | 1878(625) | 174 (57) | -        | 189(62) | 5/-          | 327(108) |
| 11045   | QX-like       | 1620(540) | 1878(625) | 174 (57) | -        | 189(62) | 5/-          | 327(108) |
| ES90    | KM91-like     | 1620(540) | 1878(625) | 174 (57) | -        | 189(62) | 5/-          | 330(109) |
| KM91    | KM91-like     | 1614(538) | 1878(625) | 147 (48) | 40       | 189(62) | 5/-          | 330(109) |
| K2      | KM91-like     | 1611(537) | 1878(625) | 147 (48) | 40       | 189(62) | 5/-          | 330(109) |
| 1123    | KM91-like     | 1617(539) | 1878(625) | 174 (57) | -        | 195(64) | -/-          | 333(110) |
| 11044   | KM91-like     | 1611(537) | 1878(625) | 147 (48) | 40       | 189(62) | 5/-          | 330(109) |
| 11051   | KM91-like     | 1611(537) | 1878(625) | 147 (48) | 40       | 189(62) | 5/-          | 330(109) |
| 9106    | New cluster-I | 1620(540) | 1878(625) | 174 (57) | -        | 195(64) | -/-          | 333(110) |
| 9137-5  | New cluster-I | 1614(538) | 1878(625) | 174 (57) | -        | 195(64) | -/-          | 333(110) |
| 9138    | New cluster-I | 1614(538) | 1878(625) | 174 (57) | -        | 195(64) | -/-          | 333(110) |
| 1038    | New cluster-I | 1620(540) | 1878(625) | 174 (57) | -        | 195(64) | -/-          | 333(110) |
| 1043    | New cluster-I | 1620(540) | 1878(625) | 174 (57) | -        | 195(64) | -/-          | 333(110) |
| 1110    | New cluster-I | 1620(540) | 1878(625) | 174 (57) | -        | 195(64) | -/-          | 333(110) |
| 1115    | New cluster-I | 1620(540) | 1878(625) | 174 (57) | -        | 195(64) | -/-          | 333(110) |
| 1116    | New cluster-I | 1620(540) | 1878(625) | 174 (57) | -        | 195(64) | -/-          | 333(110) |

<sup>a</sup> The sequence of the M41 genome was used as reference, GenBank accession no. GQ504725. The sizes of amino acids are indicated in parentheses.

**Table S2.** Pair-wise comparison of nucleotide and deduced amino acid sequences of Korean IBVs with vaccine strains KM91 and H120.

| Strains | Nucleotide and amino acid sequence identities (%) <sup>a</sup> |             |                   |                   |                   |                   |                 |                   |                 |                 |                   |                 |
|---------|----------------------------------------------------------------|-------------|-------------------|-------------------|-------------------|-------------------|-----------------|-------------------|-----------------|-----------------|-------------------|-----------------|
|         | S1-E                                                           |             | S1                |                   | S2                |                   | 3a              |                   | 3b              |                 | E                 |                 |
|         | KM91                                                           | H120        | KM91              | H120              | KM91              | H120              | KM91            | H120              | KM91            | H120            | KM91              | H120            |
| 11031   | 83.1                                                           | <b>99.8</b> | 82.4(81.4)        | <b>99.8(99.6)</b> | 85.5(88)          | <b>99.8(99.8)</b> | 65.7(51.7)      | <b>99.4(98.2)</b> | 82(76.9)        | <b>100(100)</b> | 85.5(83.7)        | <b>99.6(99)</b> |
| 11052   | 89.3                                                           | 87.6        | 82(78.8)          | <b>92.5(90.5)</b> | <b>97.5(97.7)</b> | 85.4(87.6)        | 65.7(51.7)      | 82.1(79.3)        | 81(70.7)        | 86.6(72.3)      | <b>96.3(98.1)</b> | 84.9(84.6)      |
| 8067    | 87.9                                                           | 82.6        | 79.4(77)          | 78.7(76.8)        | <b>97.3(97.1)</b> | 85.4(87.5)        | 65.1(51.7)      | 81.6(79.3)        | 80.5(72.3)      | 86.1(73.8)      | <b>95.1(94.5)</b> | 81.9(79.2)      |
| 9011    | 88.4                                                           | 82.6        | 79.8(76.6)        | 78.5(76.8)        | <b>97.4(97.2)</b> | 85.5(87.6)        | 64(53.4)        | 80.4(77.5)        | 80.5(72.3)      | 86.1(70.7)      | <b>97.2(98.1)</b> | 84.6(84.6)      |
| 8065    | 88.2                                                           | 82.1        | 85.3(85.1)        | 77(76.1)          | <b>93.6(95.5)</b> | 86.2(89.1)        | 74.8(68.9)      | 82.7(70.6)        | 71.7(64.6)      | 76.9(63)        | 86(85.4)          | 86(82.7)        |
| 1107    | 88.2                                                           | 82.1        | 85.1(85)          | 77(75.9)          | <b>93.6(95.3)</b> | 86.1(88.9)        | 74.8(68.9)      | 82.7(70.6)        | 71.7(64.6)      | 76.9(63)        | 86(85.4)          | 86(82.7)        |
| 1114    | 88.2                                                           | 82.1        | 85.3(85.1)        | 77(76.1)          | <b>93.6(95.5)</b> | 86.2(89.1)        | 74.8(68.9)      | 82.7(70.6)        | 71.7(64.6)      | 76.9(63)        | 86(85.4)          | 86(82.7)        |
| 11026   | 88.3                                                           | 82.1        | 85.4(85.3)        | 77.2(76.3)        | <b>93.8(95.5)</b> | 86.2(88.8)        | 74.8(68.9)      | 82.7(70.6)        | 71.7(64.6)      | 76.9(63)        | 85.7(84.5)        | 86.3(83.6)      |
| 11035   | 88                                                             | 81.9        | 85.1(84.6)        | 77(75.7)          | <b>93.6(95.5)</b> | 86(88.8)          | 74.2(67.2)      | 82.1(68.9)        | 71.2(63)        | 76.4(61.5)      | 85.7(84.5)        | 85.7(81.8)      |
| 11036   | 89.6                                                           | 81.6        | 85.3(84.6)        | 77(75.9)          | <b>96.2(95.6)</b> | 85.1(87.8)        | 64(51.7)        | 79.8(79.3)        | 79.4(72.3)      | 85.6(73.8)      | <b>92.1(92.7)</b> | 83.7(81.9)      |
| 11038   | 87.9                                                           | 81.5        | 85.3(85)          | 77(76.3)          | <b>94.5(96)</b>   | 86.3(88.4)        | 74.8(68.9)      | 82.7(70.6)        | 60.4(56)        | 65.7(54.6)      | 85.7(84.5)        | 86.3(83.6)      |
| 11039   | 88.1                                                           | 82.1        | 85.2(84.8)        | 77(75.9)          | <b>93.6(95.5)</b> | 86.1(89.1)        | 74.8(68.9)      | 82.7(70.6)        | 71.7(64.6)      | 76.9(63)        | 86(85.4)          | 86(82.7)        |
| 11045   | 88.1                                                           | 82          | 85.1(84.8)        | 77(75.7)          | <b>93.5(95.2)</b> | 86.1(88.8)        | 74.8(68.9)      | 82.7(70.6)        | 71.7(64.6)      | 76.9(63)        | 86(85.4)          | 86(82.7)        |
| ES90    | <b>97.7</b>                                                    | 83.7        | <b>97.9(96.6)</b> | 82.2(80.7)        | <b>99.5(99.2)</b> | 85.4(88)          | 79.4(75.8)      | 81.6(70.6)        | <b>94.7(92)</b> | 81.5(72.3)      | <b>99(99)</b>     | 84(82.8)        |
| K2      | <b>99.6</b>                                                    | 83          | <b>99.3(98.5)</b> | 82.2(81.4)        | <b>99.8(99.6)</b> | 85.4(87.8)        | <b>100(100)</b> | 64.9(51.7)        | <b>100(100)</b> | 82.5(76.9)      | <b>99.6(100)</b>  | 84(83.7)        |
| 1123    | <b>95.3</b>                                                    | 84          | <b>98.5(97.2)</b> | 82.2(80.7)        | <b>97.7(98.4)</b> | 85.7(88.3)        | 64(51.7)        | 79.8(79.3)        | 80.5(73.8)      | 86.6(75.3)      | <b>93(94.5)</b>   | 84.6(83.7)      |
| 11044   | <b>99.5</b>                                                    | 83          | <b>99.1(97.9)</b> | 82(80.9)          | <b>99.7(99.6)</b> | 85.4(87.8)        | <b>100(100)</b> | 64.9(51.7)        | <b>100(100)</b> | 82.5(76.9)      | <b>99.6(99)</b>   | 84.6(84.6)      |
| 11051   | <b>99.5</b>                                                    | 83          | <b>99.1(97.9)</b> | 82(80.9)          | <b>99.7(99.6)</b> | 85.4(87.8)        | <b>100(100)</b> | 64.9(51.7)        | <b>100(100)</b> | 82.5(76.9)      | <b>99.6(99)</b>   | 84.6(84.6)      |
| 9106    | <b>93.3</b>                                                    | 83.5        | <b>92.5(90.3)</b> | 80.9(78.3)        | <b>97.4(96.9)</b> | 85.5(87.8)        | 65.1(51.7)      | 81.6(79.3)        | 80.5(72.3)      | 87.1(73.8)      | <b>96.3(95.4)</b> | 84.3(83.7)      |
| 9137-5  | <b>93.2</b>                                                    | 83.3        | <b>92.9(90.5)</b> | 81.1(79.1)        | <b>97.8(97.6)</b> | 85.3(88.1)        | 65.1(51.7)      | 81.6(77.5)        | 80(70.7)        | 84.6(72.3)      | <b>91.8(91.8)</b> | 84(82.8)        |
| 9138    | <b>93.2</b>                                                    | 83.3        | <b>92.9(90.5)</b> | 81.1(79.1)        | <b>97.8(97.6)</b> | 85.3(88.1)        | 65.1(51.7)      | 81.6(77.5)        | 80(70.7)        | 84.6(72.3)      | <b>91.8(91.8)</b> | 84(82.8)        |
| 1038    | <b>93.3</b>                                                    | 83.4        | <b>93(91.2)</b>   | 81.5(79.8)        | <b>97.7(97.2)</b> | 85.2(88.3)        | 64(51.7)        | 79.8(79.3)        | 80(73.8)        | 86.1(75.3)      | <b>92.7(93.6)</b> | 84.3(82.8)      |
| 1043    | <b>90.7</b>                                                    | 85.4        | <b>91.4(90.5)</b> | 83.3(81.7)        | <b>93.1(93.4)</b> | 87.9(90.4)        | 64(50)          | 80.4(77.5)        | 81(73.8)        | 87.1(75.3)      | <b>93(94.5)</b>   | 84.6(83.7)      |
| 1110    | <b>93.3</b>                                                    | 83.4        | <b>93(91.1)</b>   | 81.4(79.6)        | <b>97.6(97.2)</b> | 85.2(88.3)        | 64(51.7)        | 79.8(79.3)        | 80(73.8)        | 86.1(75.3)      | <b>92.7(93.6)</b> | 84.3(82.8)      |
| 1115    | <b>93.3</b>                                                    | 83.3        | <b>93.1(91.4)</b> | 81.3(79.6)        | <b>97.5(97.1)</b> | 85.1(88.1)        | 64(51.7)        | 79.8(79.3)        | 80(73.8)        | 86.1(75.3)      | <b>92.7(93.6)</b> | 84.3(82.8)      |
| 1116    | <b>93.2</b>                                                    | 83.3        | <b>92.9(90.9)</b> | 81.3(79.4)        | <b>97.6(97.2)</b> | 85.2(88.3)        | 64(51.7)        | 79.8(79.3)        | 80(73.8)        | 86.1(75.3)      | <b>92.7(93.6)</b> | 84.3(82.8)      |

Sequences with  $\geq 90\%$  identity are indicated in bold letters; Identity rates of amino acid sequences within the parenthesis; Synonymous nucleotide changes are indicated in italics.

**Table S3.** IBV reference strains used in this study.

| IBV strains           | Years of isolation | Pathogenesis        | Country of origin | Accession numbers                   |
|-----------------------|--------------------|---------------------|-------------------|-------------------------------------|
| M41                   | Vaccine            | Respiratory         | USA               | GQ504725(S1-E) <sup>a</sup>         |
| H120                  | Vaccine            | Respiratory         | Netherlands       | GU393335(S1-E)                      |
| H52                   | Vaccine            | Respiratory         | Netherlands       | EU817497(S1-E)                      |
| Arkansas DPI          | 1981               | Respiratory         | USA               | GQ504720 (S1-E)                     |
| Conn46 1972           | 1972               | NA <sup>b</sup>     | USA               | FJ904717 (S1-E)                     |
| Gray                  | 1960               | Nephropathogenic    | USA               | GU393334 (S1-E)                     |
| Iowa                  | 1956               | NA                  | USA               | GU393337 (S1-E)                     |
| Beaudette             | 1937               | Respiratory         | USA               | NC_001451(S1-E)                     |
| Georgia               | 1998               | NA                  | USA               | GQ504722(S1-E)                      |
| JMK                   | 1964               | NA                  | USA               | GU393338(S1-E)                      |
| Holte                 | 1954               | Nephropathogenic    | USA               | GU393336(S1-E)                      |
| Delaware 072          | 1992               | NA                  | USA               | GU393332(S1-E)                      |
| Cal99                 | 1999               | NA                  | USA               | AY514485(S1-E)                      |
| Vic S                 | Vaccine            | Nephropathogenic    | Australia         | DQ490221(S1-E)                      |
| CU-T2                 | 1995               | Respiratory variant | USA               | AIU49858(S1-E)                      |
| IBV-EP3               | NA                 | NA                  | Singapore         | DQ001338 (S1-E)                     |
| IBV-p65               | NA                 | NA                  | Singapore         | DQ001339(S1-E)                      |
| TW2575/98             | 1998               | Nephropathogenic    | Taiwan            | DQ646405(S1-E)                      |
| TW2296/95             | 1995               | Nephropathogenic    | Taiwan            | DQ646404 (S1-E)                     |
| A2                    | 1996               | Nephropathogenic    | China             | EU526388(S1-E)                      |
| LX4                   | 1999               | Nephropathogenic    | China             | AY338732(S1-E)                      |
| ZJ971                 | 1997               | Proventriculus      | China             | EU714028(S1-E)                      |
| BJ                    | 1997               | Nephropathogenic    | China             | AY319651(S1-E)                      |
| SAIBK                 | NA                 | Nephropathogenic    | China             | DQ288927(S1-E)                      |
| GX-YL5                | 2005               | Nephropathogenic    | China             | HQ848267(S1-E)                      |
| KB8523                | 1988               | Nephropathogenic    | Japan             | M21515 (S1-E)                       |
| Peafowl/GD/KQ6/2003   | 2003               | NA                  | China             | AY641576(S1-E)                      |
| Partridge/GD/S14/2003 | 2003               | NA                  | China             | AY646283(S1-E)                      |
| Turkey coronavirus    | 2000               | NA                  | Canada            | NC_010800(S1-E)                     |
| LDT3                  | 2003               | Nephropathogenic    | China             | AY702975(S1-E)                      |
| ITA/90254/2005        | 2005               | NA                  | Western Africa    | FN430414(S1-E)                      |
| CK/CH/LJL/04I         | 2004               | NA                  | China             | DQ167144(S1)<br>EF602452(S2-E)      |
| CK/CH/LLN/98I         | 1998               | NA                  | China             | DQ167145(S1)<br>EF602451(S2, 3b, E) |
| CK/CH/LSD/031         | 2003               | NA                  | China             | DQ167148(S1)<br>EF602457(S2-E)      |
| CK/CH/LTJ/95I         | 1995               | NA                  | China             | DQ167151(S1)<br>EF602448(S2-E)      |
| QX                    | 1997               | Proventriculus      | China             | AF193423(S1)                        |
| Ma5                   | Vaccine            | Nephropathogenic    | USA               | AY561713(S1)                        |
| 4/91                  | Vaccine            | Respiratory         | UK                | AF093794(S1)                        |
| Italy-02              | 1999               | Respiratory         | Italy             | AJ457137(S1)                        |
| THA90151              | 2008               | Respiratory         | Thailand          | GQ503617(S1)                        |
| K281-01               | 2001               | respiratory         | Korea             | AY257062(S1)                        |

**Table S3. *Cont.***

| <b>IBV strains</b> | <b>Years of isolation</b> | <b>Pathogenesis</b> | <b>Country of origin</b> | <b>Accession numbers</b> |
|--------------------|---------------------------|---------------------|--------------------------|--------------------------|
| K210-02            | 2002                      | Respiratory         | Korea                    | AY257068(S1)             |
| K083-98            | 1998                      | Nephropathogenic    | Korea                    | FJ807936(S1)             |
| K748-01            | 2001                      | Nephropathogenic    | Korea                    | AY790358(S1)             |
| K154-05            | 2005                      | Nephropathogenic    | Korea                    | FJ807922(S1)             |
| K283-04            | 2004                      | Nephropathogenic    | Korea                    | FJ807923(S1)             |
| K40-09             | 2009                      | Nephropathogenic    | Korea                    | HM486957(S1)             |
| K245-10            | 2010                      | Nephropathogenic    | Korea                    | JF804686(S1)             |
| K308-09            | 2009                      | Nephropathogenic    | Korea                    | JF804689(S1)             |
| K26-10             | 2010                      | Nephropathogenic    | Korea                    | JF804678(S1)             |

<sup>a</sup> Sequences of the gene fragments used within the parenthesis. <sup>b</sup> NA: data not available.
